# Supplementary material
Source: Copernicus journal article supplement (doi:10.5194/amt-19-3363-2026)
Supplement: Supplementary file 1 [file amt-19-3363-2026-supplement.pdf]

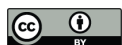

*Supplement of*

## **Calibrating interdependent photochemistry, nucleation, and aerosol microphysics in chamber experiments**

**Neil M. Donahue et al.**

*Correspondence to:* Neil M. Donahue ([nmd@andrew.cmu.edu](mailto:nmd@andrew.cmu.edu))

The copyright of individual parts of the supplement might differ from the article licence.

## S1 Excimer (UVX) stages simulation

Fig. S1 shows the simulation results for the group of stages with  $O_3$  photolysis driven by the Excimer laser (UVX). This light is less uniform than the UVH illumination, filling as a rough approximation about half the CLOUD chamber. Model agreement with the UVH case confirms that any non-uniformities are not a severe impediment to the data interpretation.

## S2 Photochemical model

### S2.1 gas-phase reactions

The gas-phase photochemistry for the OH actinometry calibration run can be modeled with the following set of reactions. The initial photochemistry is driven by odd-oxygen ( $O_x$ ) reactions:

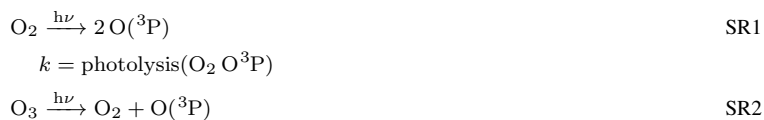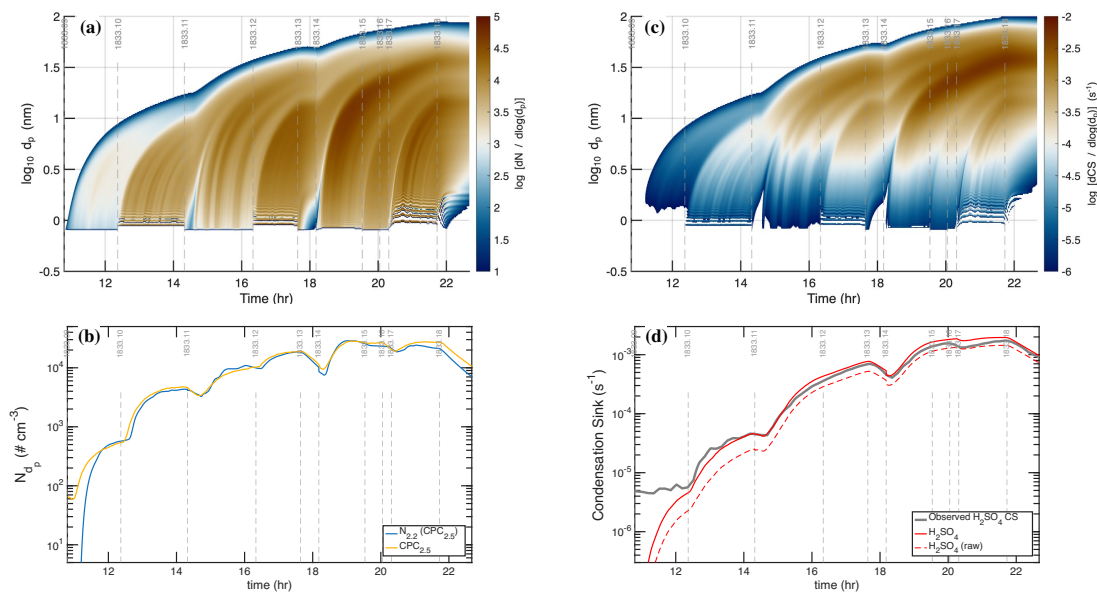

Figure S1: Optimal modeled particle size and corresponding condensation sink distributions with wet  $(NH_4)_2 \cdot SO_4 \cdot (H_2O)_n$  growth, and their agreement with measurements during the UVX stages. (a) Simulated particle size distribution ( $dN/d \log d_p$ ) for optimal parameters, with empirical nucleation coefficients and an  $H_2SO_4$  calibration factor of 1.2. (b) Simulated (blue) and observed (gold) total particle number measurable by a  $CPC_{2.5}$ . (c) Simulated condensation-sink distribution ( $dCS/d \log d_p$ ). (d) Simulated (red) and observed (gray) condensation sink. Simulated values are shown both with (solid) and without (dashed) a Van der Waals correction; the observed values include the correction; the condensation sink is reproduced with good fidelity aside from the enhanced loss during the cleaning stage, which was not simulated. Other than the low-intensity stages (O1 and O2), charged and neutral nucleation are competitive because charged nucleation is limited by ion-pair production. That saturation value serves as an additional constraint on the nucleation parameters.

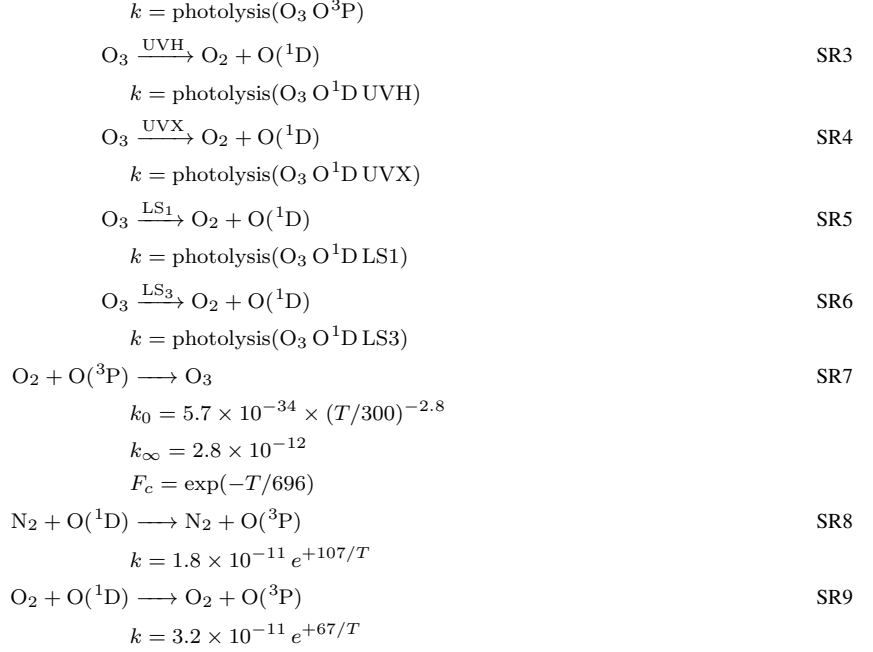

This includes three distinct  $\text{O}_3$  photolysis representations so that the model will keep track of the separate contributions of individual lights during stages when more than one light is illuminated. This feeds into odd-hydrogen ( $\text{HO}_x$ ) chemistry:

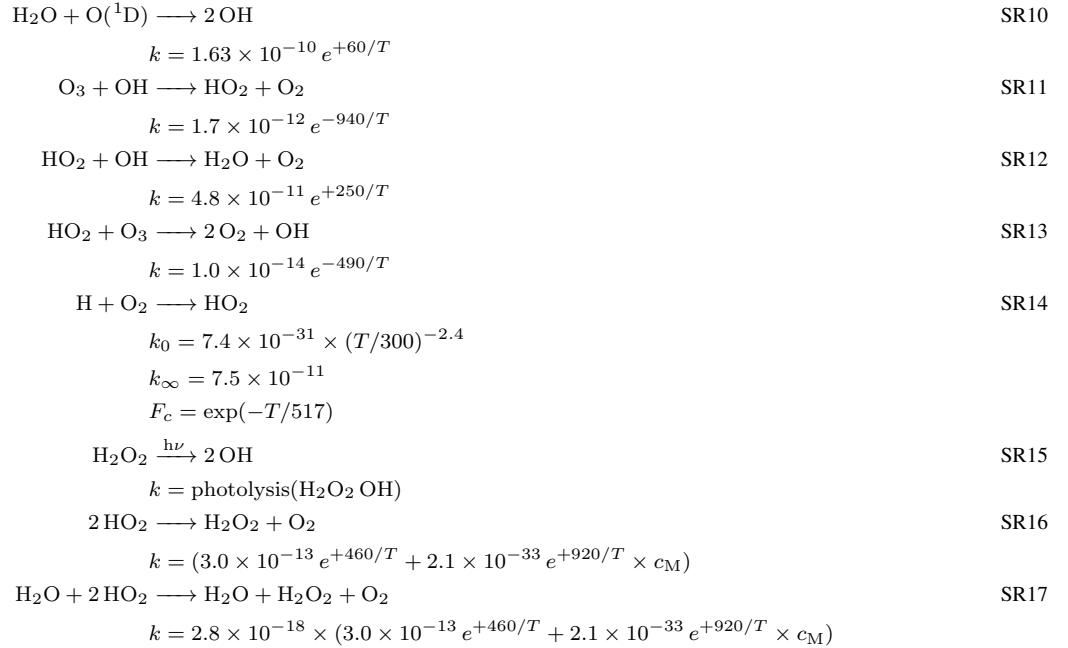

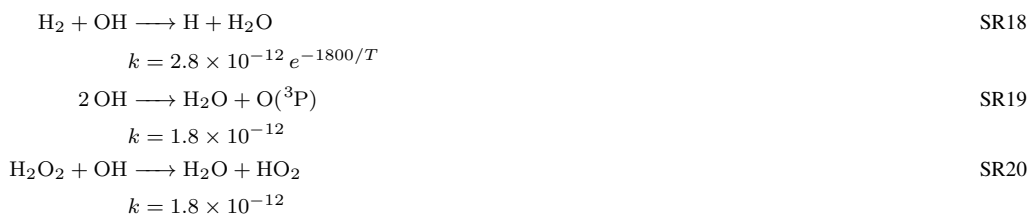

Reaction with CO is a major OH sink, and in the base model is the only “hydrocarbon” reaction treated.

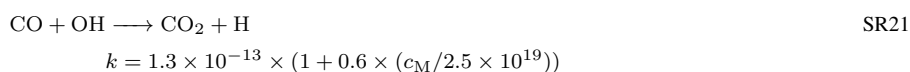

Finally, OH is also the sink of SO<sub>2</sub> and ultimately source of H<sub>2</sub>SO<sub>4</sub>:

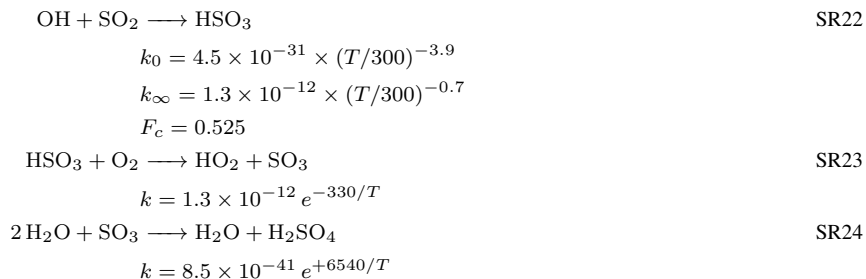

Wall loss in general is modeled as a process relevant to all species in the photochemical system, with wall collision frequencies scaled by the (empirically constrained) H<sub>2</sub>SO<sub>4</sub> wall loss (collision frequency) and an uptake coefficient (assumed to be  $\gamma = 1$ ) for H<sub>2</sub>SO<sub>4</sub>. In addition, based on the observed 1:1 stoichiometry of SO<sub>2</sub> and O<sub>3</sub> loss when especially the 385 nm UV light emitting diodes (LS3) are on at full power, a photon-mediated uptake of SO<sub>2</sub> and O<sub>3</sub> (presumably to make wall-adsorbed H<sub>2</sub>SO<sub>4</sub>) is included in the mechanism.

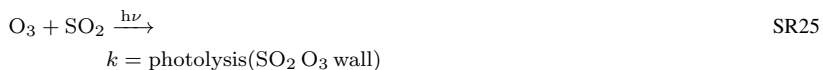

## S2.2 ion reactions

Nucleation as well as ion production and loss can be treated with a set of pseudo-reactions creating and removing primary ions ( $n^\pm$ ) as well as nucleated clusters (2 nm particles in three charge states,  $p_2^{\circ,\pm}$  above and  $c_{n,m,p}$  here). Here the subscripts  $n$ ,  $m$ , and  $p$  indicate charge, as “neutral”, “minus (negative)” and “positive” (i.e.  $\circ$ ,  $-$ , and  $+$  elsewhere):

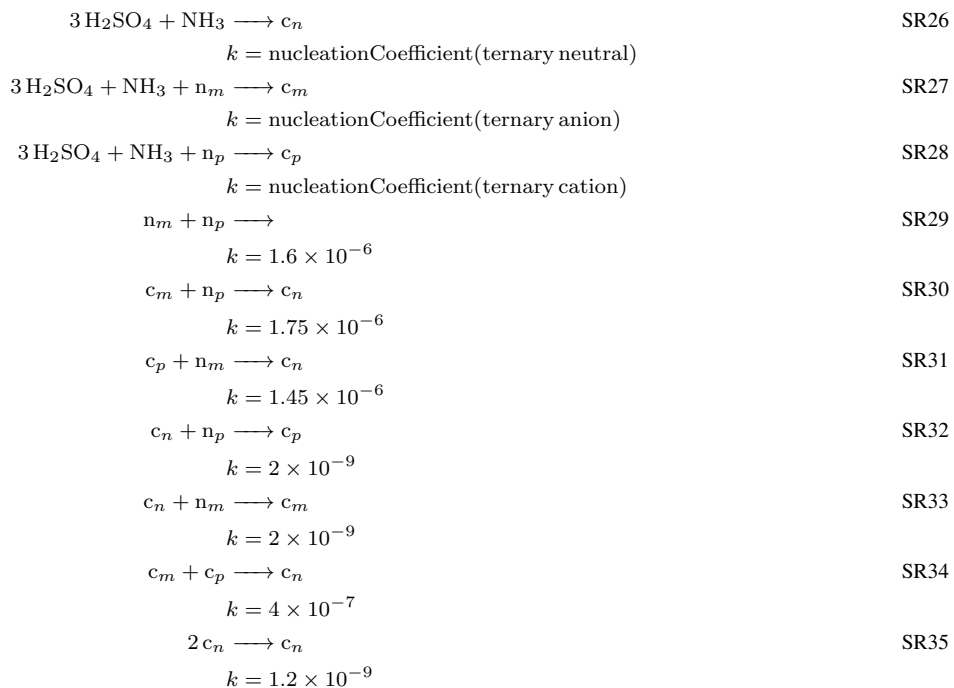

### S2.3 modal microphysics

The modal representation continues with growth from 2 nm to a nanoparticle nucleation mode at 5 nm,  $np_{n,m,p}$ . The growth is a first-order “reaction” with  $\text{H}_2\text{SO}_4$  but with a rate constant reflecting of order 100 collisions required for 3 nm of growth. Coagulation as well as diffusion charging and neutralization by both primary ions and charged 2 nm particles is also treated.

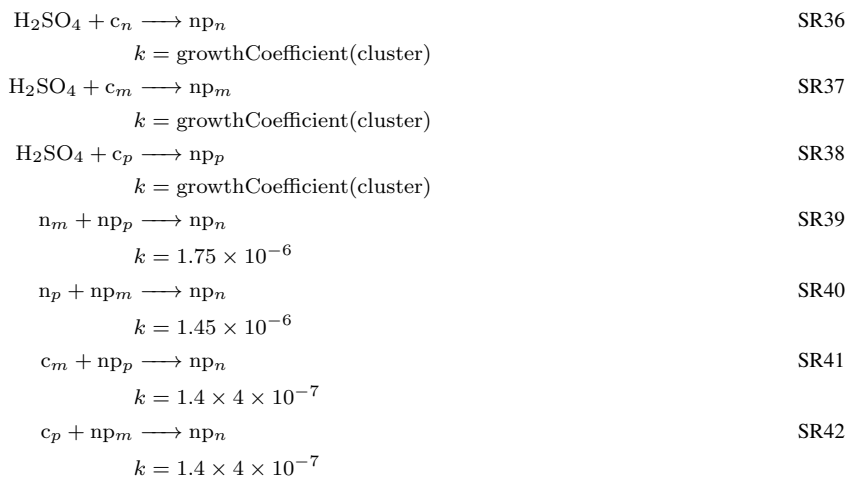

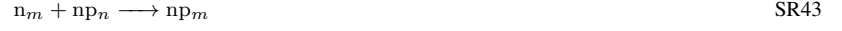

$$k = 3 \times 10^{-8}$$

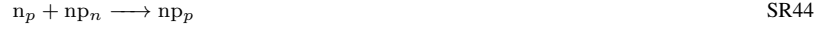

$$k = 3 \times 10^{-8}$$

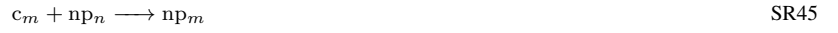

$$k = 1 \times 10^{-8}$$

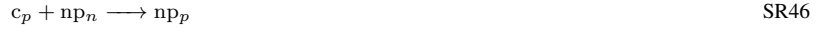

$$k = 1 \times 10^{-8}$$

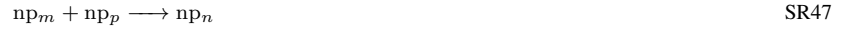

$$k = 1 \times 10^{-7}$$

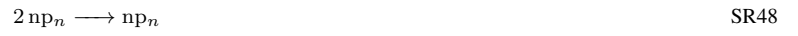

$$k = 1.5 \times 10^{-9}$$

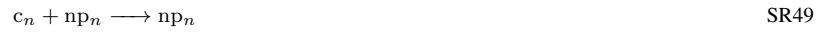

$$k = 3 \times 10^{-9}$$

Finally, growth to an Aitken mode at 15 nm,  $a_{n,m,p}$ , requires 1000s of collisions of  $\text{H}_2\text{SO}_4$  with those growing nanoparticles, and the resulting Aitken mode particles can interact with all of the smaller nanoparticles and clusters, in all charge states. We ignore formation of doubly charged particles for all these sizes as negligible.

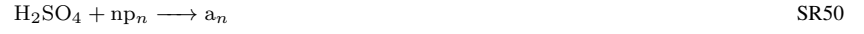

$$k = \text{growthCoefficient(nano)}$$

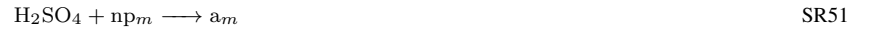

$$k = \text{growthCoefficient(nano)}$$

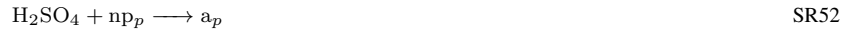

$$k = \text{growthCoefficient(nano)}$$

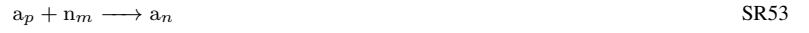

$$k = 1.75 \times 10^{-6}$$

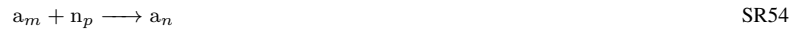

$$k = 1.45 \times 10^{-6}$$

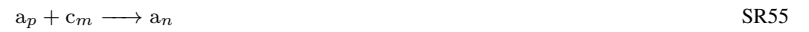

$$k = 1.4 \times 4 \times 10^{-7}$$

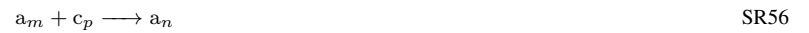

$$k = 1.4 \times 4 \times 10^{-7}$$

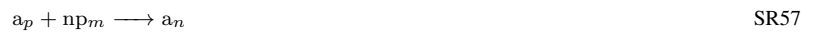

$$k = 1.4 \times 1 \times 10^{-7}$$

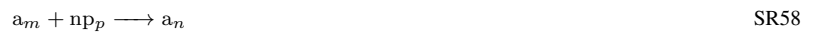

$$k = 1.4 \times 1 \times 10^{-7}$$

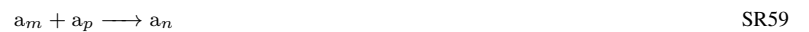

$$k = 2 \times 10^{-8}$$

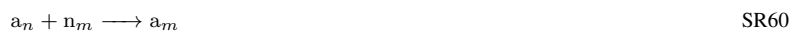

$$k = 1 \times 10^{-7}$$

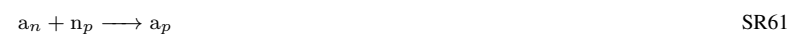

$$k = 1 \times 10^{-7}$$

$$a_n + c_m \longrightarrow a_m \quad \text{SR62}$$

$$k = 3 \times 10^{-8}$$

$$a_n + c_p \longrightarrow a_p \quad \text{SR63}$$

$$k = 3 \times 10^{-8}$$

$$a_n + np_m \longrightarrow a_m \quad \text{SR64}$$

$$k = 7 \times 10^{-9}$$

$$a_n + np_p \longrightarrow a_p \quad \text{SR65}$$

$$k = 7 \times 10^{-9}$$

$$2 a_n \longrightarrow a_n \quad \text{SR66}$$

$$k = 2 \times 10^{-9}$$

$$a_n + np_n \longrightarrow a_n \quad \text{SR67}$$

$$k = 4 \times 10^{-9}$$

$$a_n + c_n \longrightarrow a_n \quad \text{SR68}$$

$$k = 8 \times 10^{-9}$$
